# Supplementary material for: Comparison of Machine Learning Models Including Preoperative, Intraoperative, and Postoperative Data and Mortality After Cardiac Surgery
Source: PubMed Central journal article supplement (PMC9606847; doi:10.1001/jamanetworkopen.2022.37970), 2022-10-26
Supplement: jamanetwopen-e2237970-s001.pdf [file jamanetwopen-e2237970-s001.pdf]

## Supplemental Online Content

Castela Forte J, Yeshmagambetova G, van der Grinten ML, et al. Comparison of machine learning models including preoperative, intraoperative, and postoperative data and mortality after cardiac surgery. *JAMA Netw Open*. 2022;5(10):e2237970. doi:10.1001/jamanetworkopen.2022.37970

**eTable 1.** Grid Search Hyperparameter Ranges for Long Short-Term Memory Neural Network and Extreme Gradient-Boosting Machine Algorithms

**eTable 2.** Complete Demographic Characteristics and Preoperative, Intraoperative, and Postoperative Variables

**eTable 3.** Area Under Receiver Operating Characteristic Curves for Models for 30-d Mortality Prediction

**eTable 4.** Area Under Receiver Operating Characteristic Curves for Models for 1-y Mortality Prediction

**eTable 5.** Area Under Receiver Operating Characteristic Curves for Models for 5-y Mortality Prediction

**eFigure 1.** Survival Curves and Survival Statistics for Entire Cohort and by Operation Type

**eFigure 2.** Calibration Plot for Model Predicting 30-d Mortality in Full Cohort

**eFigure 3.** Calibration Plot for Model Predicting 1-y Mortality in Full Cohort

**eFigure 4.** Calibration Plot for Model Predicting 5-y Mortality in Full Cohort

**eFigure 5.** Predictiveness Plots for Models Including Data From All 3 Perioperative Periods

**eFigure 6.** Predictiveness Plots for Models Including Postoperative Data Only

**eFigure 7.** Contribution of Input Features to Mortality Predictions for Coronary Artery Bypass Grafting Operations

**eFigure 8.** Contributions of Input Features to Mortality Predictions for Valve Operations

**eFigure 9.** Contributions of Input Features on Mortality Predictions for Combined Operations

This supplemental material has been provided by the authors to give readers additional information about their work.

**eTable 1.** Grid Search Hyperparameter Ranges for Long Short-Term Memory Neural Network and Extreme Gradient-Boosting Machine Algorithms

| Algorithm | Grid search parameters with intervals and final parameter values |                 |
|-----------|------------------------------------------------------------------|-----------------|
| LSTM      | Epochs                                                           | 70 [50-150]     |
|           | Neurons                                                          | 128 [32-128]    |
|           | Batch size                                                       | 64 [16-64]      |
|           | Dropout                                                          | 0.6 [0.0-0.6]   |
| XGBoost   | Number of estimators                                             | 300 [100-300]   |
|           | Learning rate                                                    | 0.01 [0.01-0.1] |
|           | Minimum child weight                                             | 1 [1-5]         |
|           | Maximum depth                                                    | 7 [3-9]         |
|           | Maximum delta step                                               | 1 [0-3]         |
|           | Subsample                                                        | 0.8 [0.0-1.0]   |
|           | Scale position weight                                            | 2.5 [0.3-1.0]   |

**eTable 2.** Complete Demographic Characteristics and Preoperative, Intraoperative, and Postoperative Variables

| Variable                                                                         | No. (%) (N = 9415)   |                         |           | Missingness (%) |
|----------------------------------------------------------------------------------|----------------------|-------------------------|-----------|-----------------|
|                                                                                  | Survivors (n = 8611) | Non-survivors (n = 804) | P-value   |                 |
| <b>Summary pre- and post-operative and demographics variables, mean (95% CI)</b> |                      |                         |           |                 |
| BMI                                                                              | 20.4 (20.4,20.4)     | 20.63 (20.5,20.8)       | P < 0.001 | 0.0             |
| Age, median (IQR), years                                                         | 67.0 (74.0)          | 71.0 (77.0)             | P < 0.001 | 0.0             |
| Sex, N (%)                                                                       |                      |                         |           |                 |
| Women                                                                            | 2554 (27.1)          | 270 (2.9)               | 0.020     | 0.0             |
| Men                                                                              | 6057 (64.3)          | 534 (5.7)               |           | 0.0             |
| Type of operation, N (%)                                                         |                      |                         |           | 0.0             |
| CABG surgery, N (%)                                                              | 5126 (59.5)          | 421 (52.4)              | P < 0.001 |                 |
| Combined surgery, N (%)                                                          | 1175 (13.6)          | 158 (19.7)              | P < 0.001 |                 |
| Valve surgery, N (%)                                                             | 2310 (26.8)          | 225 (28.0)              | P < 0.001 |                 |
| Preoperative creatinine, mg/dL                                                   | 1.10 (1.09,1.11)     | 1.43 (1.35,1.52)        | P < 0.001 | 5.3             |
| Postoperative creatinine, mg/dL                                                  | 1.02 (1.01,1.03)     | 1.49 (1.41,1.56)        | P < 0.001 | 0.2             |
| Maximum postoperative creatinine, mg/dL                                          | 108.9 (107.2,110.7)  | 184.5 (172.7,196.3)     | P < 0.001 | 0.2             |
| Preoperative urea, mg/dL                                                         | 22.1 (21.6,22.4)     | 27.2 (25.8,28.3)        | P < 0.001 | 7.4             |
| Postoperative urea, mg/dL                                                        | 35.6 (34.5,36.7)     | 42.3 (39.5,45.1)        | P < 0.001 | 7.1             |
| Preoperative LDH, U/L                                                            | 233.3 (230.9,235.7)  | 287.7 (268.3,307.1)     | P < 0.001 | 12.3            |
| Postoperative LDH, U/L                                                           | 353.4 (349.4,357.4)  | 623.6 (580.1,667.1)     | P < 0.001 | 1.1             |
| Maximum postoperative LDH, U/L                                                   | 439.2 (421.5,457.0)  | 1216.8 (988.1,1445.8)   | P < 0.001 | 1.1             |
| Postoperative blood glucose, mg/dL                                               | 158.6 (158.5,158.7)  | 169.4 (165.8,171.2)     | P < 0.001 | 0.3             |
| Maximum postoperative glucose, mg/dL                                             | 205.4 (203.6,207.2)  | 236.4 (230.6,241.4)     | P < 0.001 | 0.3             |
| Preoperative Hb, g/dL                                                            | 15.31 (14.99,15.47)  | 16.44 (14.50,18.53)     | 0.03      | 6.2             |
| Postoperative Hb, g/dL                                                           | 10.15 (9.99,10.31)   | 9.67 (9.35,9.99)        | P < 0.001 | 0.2             |
| Minimum postoperative Hb, g/dL                                                   | 8.06 (8.06,8.22)     | 7.57 (7.41,7.73)        | 0.30      | 0.2             |
| Preoperative thrombocytes, x10 <sup>3</sup> /μL                                  | 237.4 (235.8,238.9)  | 233.6 (227.5,239.8)     | 0.17      | 6.9             |
| Postoperative thrombocytes, x10 <sup>3</sup> /μL                                 | 161.3 (160.2,162.5)  | 144.5 (140.1,148.9)     | P < 0.001 | 0.4             |
| Preoperative leukocytes, x10 <sup>3</sup> /μL                                    | 8.5 (8.4,8.7)        | 10.0 (8.0,12.0)         | P < 0.001 | 7.6             |
| Postoperative leukocytes, x10 <sup>3</sup> /μL                                   | 13.8 (13.7,13.9)     | 15.2 (14.3,16.0)        | P < 0.001 | 0.7             |
| Preoperative ALAT,U/L                                                            | 36.9 (35.9,37.9)     | 34.9 (32.3,37.5)        | 0.22      | 12.7            |
| Postoperative ALAT, U/L                                                          | 40.6 (38.4,42.9)     | 103.4 (85.3,121.5)      | P < 0.001 | 6.4             |

|                                                                   |                     |                     |           |      |
|-------------------------------------------------------------------|---------------------|---------------------|-----------|------|
| Preoperative ASAT, U/L                                            | 34.3 (33.3,35.3)    | 41.5 (35.7,47.2)    | P < 0.001 | 12,8 |
| Postoperative ASAT, U/L                                           | 56.4 (54.5,58.2)    | 157.5 (132.9,182.0) | P < 0.001 | 6.2  |
| Preoperative ESR, mm/hour                                         | 19.7 (19.3,20.0)    | 27.7 (26.1,29.3)    | P < 0.001 | 26.2 |
| Postoperative neutrophils, x10 <sup>3</sup> /μL                   | 11.8 (11.8,11.9)    | 12.5 (12.1,12.8)    | P < 0.001 | 34.8 |
| Postoperative monocytes, x10 <sup>3</sup> /μL                     | 3.6 (3.6,3.7)       | 3.7 (3.6,3.9)       | 0.39      | 30.1 |
| Postoperative lymphocytes, x10 <sup>3</sup> /μL                   | 1.4 (1.3,1.4)       | 1.9 (1.6,2.1)       | 0.004     | 30.5 |
| Preoperative eCCR (ml/min/1.73 m <sup>2</sup> )                   | 76.3 (72.8,79.8)    | 83.2 (72.8,93.6)    | 0.112     | 96.1 |
| Postoperative eCCR (ml/min/1.73 m <sup>2</sup> )                  | 92.3 (90.2,94.0)    | 84.9 (80.1,89.8)    | P < 0.001 | 64.5 |
| <b>Intraoperative variables</b>                                   |                     |                     |           |      |
| HR during perfusion, bpm                                          | 63.2 (62.5,64.0)    | 67.6 (65.3,69.9)    | 0.001     | 20.4 |
| SBP during perfusion, mmHg                                        | 70.6 (70.4,70.9)    | 69.5 (68.5,70.5)    | 0.02      | 16.2 |
| DBP during perfusion, mmHg                                        | 58.3 (58.1,58.6)    | 56.4 (55.5,57.3)    | P < 0.001 | 16.2 |
| CVP during perfusion, mmHg                                        | 6.8 (6.7,6.9)       | 7.6 (6.7,8.5)       | 0.002     | 11.3 |
| CETCO2 during perfusion,                                          | 1.08 (1.07,1.09)    | 1.2 (1.11,1.20)     | P < 0.001 | 9.9  |
| HR at start surgery, bpm                                          | 68.1 (67.6,68.6)    | 73.4 (71.7,75.2)    | P < 0.001 | 16.2 |
| SBP at start surgery, mmHg                                        | 114.5 (113.4,115.6) | 116.4 (112.5,120.4) | 0.32      | 16.2 |
| DBP at start surgery, mmHg                                        | 65.3 (64.2,66.3)    | 64.7 (61.0,68.4)    | 0.76      | 16.2 |
| CVP at start surgery, mmHg                                        | 11.8 (11.0,12.5)    | 13.9 (11.0,16.9)    | 0.10      | 11.3 |
| CETCO2 at start surgery                                           | 2.8 (2.7,2.8)       | 2.805 (2.7,2.9)     | 0.77      | 9.9  |
| Duration of perfusion, min                                        | 127.4 (126.2,128.6) | 152.7 (146.9,158.5) | P < 0.001 | 0.0  |
| Maximum CPB flow                                                  | 37.6 (36.6,38.5)    | 38.7 (35.3,42.1)    | 0.51      | 0.0  |
| Minimum body temperature, C                                       | 28.4 (28.3,28.5)    | 27.5 (27.2,27.8)    | P < 0.001 | 37.0 |
| <b>Time-series laboratory values, mean (95% CI)</b>               |                     |                     |           |      |
| eCCR within 24 hours before surgery (ml/min/1.73 m <sup>2</sup> ) | 64.2 (62.8,64.9)    | 58.9 (52.0,67.9)    | 0.096     | 83.0 |
| Postoperative eCCR (ml/min/1.73 m <sup>2</sup> )                  | 92.3 (90.2,94.0)    | 84.9 (80.1,89.8)    | P < 0.001 | 64.5 |
| eCCR 0-6 hours after surgery (ml/min/1.73 m <sup>2</sup> )        | 74.2 (71.8,76.7)    | 80.4 (67.9,92.6)    | 0.013     | 55.8 |
| eCCR 6-12 hours after surgery (ml/min/1.73 m <sup>2</sup> )       | 83.2 (80.1,86.7)    | 72.2 (63.8,80.5)    | P < 0.001 | 65.5 |
| eCCR 12-24 hours after surgery (ml/min/1.73 m <sup>2</sup> )      | 76.3 (74.2,78.7)    | 71.45 (65.9,77.0)   | 0.051     | 60.3 |
| eCCR at day 2 after surgery (ml/min/1.73 m <sup>2</sup> )         | 84.3 (81.5,87.4)    | 77.3 (70.8,83.9)    | 0.001     | 72.1 |
| eCCR at day 3 after surgery (ml/min/1.73 m <sup>2</sup> )         | 83.9 (81.9,86.0)    | 78.38 (70.1,86.4)   | P < 0.001 | 85.0 |
| eCCR at day 4 after surgery (ml/min/1.73 m <sup>2</sup> )         | 87.7 (86.0,89.5)    | 83.9 (76.3,91.2)    | P < 0.001 | 85.4 |

|                                                           |                     |                     |           |      |
|-----------------------------------------------------------|---------------------|---------------------|-----------|------|
| Per-operative eCCR decrease (ml/min/1.73 m <sup>2</sup> ) | 14.2 (10.8,18.0)    | 24.3 (13.5,35.3)    | 0.099     | 83.0 |
| Per-operative eCCR ratio                                  | 2.0 (1.9,2.1)       | 2.3 (1.9,2.7)       | 0.152     | 83.0 |
| Creatinine within 24 hours before surgery, mg/dL          | 0.98 (0.97,1.00)    | 1.30 (1.22,1.37)    | P < 0.001 | 68.0 |
| Creatinine 0-6 hours after surgery, mg/dL                 | 0.95 (0.94,0.96)    | 1.36 (1.28,1.44)    | P < 0.001 | 66.3 |
| Creatinine 12-24 hours after surgery, mg/dL               | 0.94 (0.92,0.95)    | 1.34 (1.26,1.42)    | P < 0.001 | 82.3 |
| Creatinine 24 hours after surgery, mg/dL                  | 0.99 (0.98,1.00)    | 1.40 (1.32,1.48)    | P < 0.001 | 14.9 |
| Creatinine at day 2 after surgery, mg/dL                  | 1.10 (1.08,1.11)    | 1.55 (1.47,1.63)    | P < 0.001 | 4.3  |
| Creatinine at day 3 after surgery, mg/dL                  | 1.08 (1.06,1.09)    | 1.62 (1.52,1.71)    | P < 0.001 | 64.2 |
| Creatinine at day 4 after surgery, mg/dL                  | 1.05 (1.04,1.07)    | 1.56 (1.47,1.66)    | P < 0.001 | 56.4 |
| Absolute difference in creatinine, mg/dL                  | 15.7 (15.0,16.3)    | 32.5 (28.6,36.4)    | P < 0.001 | 5.3  |
| Relative difference in creatinine                         | -11.5 (-12.1,-10.8) | -2.2 (-4.8,0.4)     | P < 0.001 | 5.3  |
| Percentual difference in creatinine, %                    | 22.4 (18.8,26.1)    | 24.6 (22.0,27.1)    | 0.72      | 5.3  |
| Urea within 24 hours before surgery, mg/dL                | 35.3 (33.9,36.7)    | 37.3 (34.7,40.1)    | 0.38      | 69.3 |
| Urea 0-6 hours after surgery, mg/dL                       | 59.4 (57.9,60.5)    | 59.9 (56.0,63.6)    | P < 0.001 | 66.7 |
| Urea 6-12 hours after surgery, mg/dL                      | 100.6 (98.3,102.8)  | 98.9 (92.7,105.0)   | 0.16      | 83.3 |
| Urea 12-24 hours after surgery, mg/dL                     | 27.2 (26.3,28.3)    | 31.9 (29.7,34.2)    | P < 0.001 | 15.3 |
| Urea at day 2 after surgery, mg/dL                        | 38.1 (36.1,39.8)    | 45.9 (41.7,50.4)    | P < 0.001 | 4.5  |
| Urea at day 3 after surgery, mg/dL                        | 41.7 (39.5,44.0)    | 50.4 (43.1,57.9)    | P < 0.001 | 64.6 |
| Urea at day 4 after surgery, mg/dL                        | 27.5 (24.9,30.3)    | 51.5 (42.6,60.8)    | P < 0.001 | 56.7 |
| LDH within 24 hours before surgery, U/L                   | 244.1 (240.8,247.4) | 285.7 (261.1,310.3) | P < 0.001 | 75.1 |
| LDH 0-6 hours after surgery, U/L                          | 296.9 (293.6,300.3) | 422.6 (376.1,469.1) | P < 0.001 | 72.4 |
| LDH 6-12 hours after surgery, U/L                         | 364.4 (361.4,367.4) | 520.1 (487.8,552.4) | P < 0.001 | 76.5 |
| LDH 12- 24 hours after surgery, U/L                       | 370.6 (365.3,375.9) | 606.1 (538.5,673.8) | P < 0.001 | 17.5 |
| LDH at day 2 after surgery, U/L                           | 370.3 (364.7,375.9) | 606.3 (553.1,659.5) | P < 0.001 | 8.9  |
| LDH at day 3 after surgery, U/L                           | 408.2 (398.8,417.7) | 627.1 (557.1,697.2) | P < 0.001 | 71.0 |
| LDH at day 4 after surgery, U/L                           | 366.2 (362.2,370.2) | 619.9 (539.0,700.8) | P < 0.001 | 62.3 |
| Blood glucose 0-6 hours after surgery, mg/dL              | 167.5 (167.6,169.4) | 185.5 (181.9,189.1) | P < 0.001 | 8.8  |
| Blood glucose 6-12 hours after surgery, mg/dL             | 176.6 (174.7,178.4) | 194.6 (189.1,196.4) | P < 0.001 | 13.6 |
| Blood glucose 12-24 hours after surgery, mg/dL            | 153.2 (151.4,153.2) | 169.4 (165.2,171.2) | P < 0.001 | 8.2  |

|                                                                   |                     |                     |           |      |
|-------------------------------------------------------------------|---------------------|---------------------|-----------|------|
| Blood glucose at day 2 after surgery, mg/dL                       | 153.2 (151.3,153.1) | 163.9 (160.4,167.6) | P < 0.001 | 65.7 |
| Blood glucose at day 3 after surgery, mg/dL                       | 163.9 (162.2,163.9) | 173.0 (167.6,176.6) | 0.003     | 78.4 |
| Blood glucose at day 4 after surgery, mg/dL                       | 158.6 (156.8,158.6) | 160.4 (156.8,163.9) | 0.16      | 83.6 |
| Hb within 24 hours before surgery, g/dL                           | 14.66 (14.34,15.15) | 16.62 (14.02,19.17) | 0.01      | 64.0 |
| Hb 0-6 hours after surgery, g/dL                                  | 9.35 (9.18,9.35)    | 9.02 (8.86,9.02)    | P < 0.001 | 4.3  |
| Hb 6-12 hours after surgery, g/dL                                 | 9.83 (9.67,9.99)    | 9.35 (9.35,9.51)    | P < 0.001 | 7.3  |
| Hb 12-24 hours after surgery, g/dL                                | 9.99 (9.83,9.99)    | 9.51 (9.51,9.67)    | P < 0.001 | 5.3  |
| Hb at day 2 after surgery, g/dL                                   | 10.63 (10.15,11.12) | 9.51 (9.35,9.67)    | P < 0.001 | 4.0  |
| Hb at day 3 after surgery, g/dL                                   | 9.83 (9.67,10.15)   | 9.67 (9.35,10.15)   | P < 0.001 | 63.0 |
| Hb at day 4 after surgery, g/dL                                   | 10.15 (9.83,10.47)  | 10.15 (8.86,11.28)  | P < 0.001 | 55.5 |
| Leukocytes within 24 hours before surgery, x10 <sup>3</sup> /μL   | 8.3 (8.1,8.5)       | 10.5 (6.9,14.1)     | 0.001     | 69.3 |
| Leukocytes 0-6 hours after surgery, x10 <sup>3</sup> /μL          | 13.4 (13.3,13.5)    | 14.3 (13.8,14.8)    | 0.001     | 55.5 |
| Leukocytes 6-12 hours after surgery, x10 <sup>3</sup> /μL         | 12.8 (12.8,12.9)    | 12.7 (12.4,13.0)    | 0.09      | 80.2 |
| Leukocytes 12-24 hours after surgery, x10 <sup>3</sup> /μL        | 13.9 (13.8,14.0)    | 13.8 (13.4,14.1)    | 0.06      | 15.7 |
| Leukocytes at day 2 after surgery, x10 <sup>3</sup> /μL           | 16.7 (16.5,16.7)    | 17.0 (16.6,17.4)    | 0.08      | 6.1  |
| Leukocytes at day 3 after surgery, x10 <sup>3</sup> /μL           | 14.7 (14.6,14.9)    | 15.7 (14.9,15.6)    | P < 0.001 | 67.1 |
| Leukocytes at day 4 after surgery, x10 <sup>3</sup> /μL           | 12.3 (11.9,12.7)    | 15.4 (11.9,18.9)    | P < 0.001 | 59.4 |
| Thrombocytes within 24 hours before surgery, x10 <sup>3</sup> /μL | 224.7 (223.1,226.4) | 220.0 (213.3,226.6) | 0.11      | 66.1 |
| Thrombocytes 0-6 hours after surgery, x10 <sup>3</sup> /μL        | 149.9 (148.8,151.0) | 143.6 (139.3,147.9) | P < 0.001 | 7.6  |
| Thrombocytes 6-12 hours after surgery, x10 <sup>3</sup> /μL       | 162.1 (160.9,163.3) | 145.6 (141.2,149.9) | P < 0.001 | 35.6 |
| Thrombocytes 12-24 hours after surgery, x10 <sup>3</sup> /μL      | 164.3 (163.1,165.6) | 145.7 (141.3,150.1) | P < 0.001 | 12.2 |
| Thrombocytes at day 2 after surgery, x10 <sup>3</sup> /μL         | 158.6 (157.4,159.7) | 139.2 (134.9,143.5) | P < 0.001 | 55.0 |
| Thrombocytes at day 3 after surgery, x10 <sup>3</sup> /μL         | 153.4 (152.3,154.6) | 133.1 (128.6,137.7) | P < 0.001 | 78.2 |
| Thrombocytes at day 4 after surgery, x10 <sup>3</sup> /μL         | 168.5 (167.1,169.8) | 141.9 (136.4,147.4) | P < 0.001 | 74.8 |
| ALAT within 24 hours before surgery, U/L                          | 41.2 (40.2,42.2)    | 43.4 (40.0,46.8)    | 0.21      | 74.8 |
| ALAT 0-6 hours after surgery, U/L                                 | 32.2 (31.4,32.9)    | 37.9 (32.3,43.6)    | 0.07      | 61.9 |
| ALAT 6-12 hours after surgery, U/L                                | 38.4 (37.7,39.1)    | 51.4 (43.4,59.5)    | P < 0.001 | 78.7 |
| ALAT 12-24 hours after surgery, U/L                               | 35.1 (32.8,37.4)    | 61.5 (44.2,78.9)    | 0.11      | 20.9 |
| ALAT at day 2 after surgery, U/L                                  | 37.1 (34.5,39.7)    | 74.9 (55.5,94.2)    | P < 0.001 | 43.1 |

|                                                             |                    |                     |           |      |
|-------------------------------------------------------------|--------------------|---------------------|-----------|------|
| ALAT at day 3 after surgery, U/L                            | 63.6 (61.0,66.2)   | 110.2 (86.2,134.3)  | 0.04      | 77.5 |
| ALAT at day 4 after surgery, U/L                            | 58.3 (55.8,60.7)   | 115.5 (85.8,145.2)  | 0.31      | 70.4 |
| ASAT within 24 hours before surgery, U/L                    | 44.8 (43.1,46.4)   | 49.7 (40.4,58.9)    | 0.11      | 74.7 |
| ASAT 0-6 hours after surgery, U/L                           | 49.4 (47.7,51.1)   | 77.8 (62.1,93.5)    | 0.66      | 64.1 |
| ASAT 6-12 hours after surgery, U/L                          | 74.5 (72.9,76.1)   | 119.1 (104.9,133.3) | P < 0.001 | 78.7 |
| ASAT 12-24 hours after surgery, U/L                         | 70.2 (67.6,72.7)   | 157.6 (123.1,192.2) | P < 0.001 | 21.1 |
| ASAT at day 2 after surgery, U/L                            | 60.2 (57.2,63.1)   | 148.8 (112.0,185.6) | P < 0.001 | 12.6 |
| ASAT at day 3 after surgery, U/L                            | 101.2 (98.3,104.0) | 142.8 (113.8,171.8) | 0.002     | 72.2 |
| ASAT at day 4 after surgery, U/L                            | 67.6 (65.2,70.1)   | 158.8 (115.2,202.5) | 0.11      | 63.5 |
| ESR within 24 hours before surgery, mm/hour                 | 19.5 (19.1,19.8)   | 27.8 (26.2,29.5)    | P < 0.001 | 83.3 |
| Neutrophils 0-6 hours after surgery, x10 <sup>3</sup> /μL   | 11.3 (11.1,11.2)   | 11.3 (10.9,11.7)    | 0.96      | 98.9 |
| Neutrophils 6-12 hours after surgery, x10 <sup>3</sup> /μL  | 11.1 (11.1,11.2)   | 10.6 (10.3,11.0)    | 0.001     | 94.2 |
| Neutrophils 12-24 hours after surgery, x10 <sup>3</sup> /μL | 11.8 (11.7,11.9)   | 11.4 (11.0,11.7)    | 0.002     | 44.5 |
| Neutrophils at day 2 after surgery, x10 <sup>3</sup> /μL    | 13.7 (13.6,13.8)   | 13.9 (13.6,14.3)    | 0.18      | 88.2 |
| Neutrophils at day 3 after surgery, x10 <sup>3</sup> /μL    | 11.8 (11.7,11.9)   | 12.5 (12.2,12.8)    | P < 0.001 | 92.4 |
| Neutrophils at day 4 after surgery, x10 <sup>3</sup> /μL    | 9.6 (9.3,9.9)      | 11.9 (9.3,14.5)     | P < 0.001 | 94.2 |
| Monocytes 0-6 hours after surgery, x10 <sup>3</sup> /μL     | 2.9 (2.8,2.9)      | 2.5 (2.1,2.9)       | 0.81      | 98.7 |
| Monocytes 6-12 hours after surgery, x10 <sup>3</sup> /μL    | 3.2 (3.1,3.2)      | 3.3 (3.1,3.4)       | 0.22      | 93.8 |
| Monocytes 12-24 hours after surgery, x10 <sup>3</sup> /μL   | 3.4 (3.4,3.5)      | 3.4 (3.3,3.6)       | 0.74      | 39.4 |
| Monocytes at day 2 after surgery, x10 <sup>3</sup> /μL      | 4.2 (4.2,4.2)      | 4.3 (4.1,4.5)       | 0.67      | 85.3 |
| Monocytes at day 3 after surgery, x10 <sup>3</sup> /μL      | 3.9 (3.8,3.9)      | 3.8 (3.7,4.0)       | 0.03      | 90.8 |
| Monocytes at day 4 after surgery, x10 <sup>3</sup> /μL      | 3.8 (3.8,3.9)      | 3.9 (3.7,4.0)       | 0.05      | 92.8 |
| Lymphocytes 0-6 hours after surgery, x10 <sup>3</sup> /μL   | 1.5 (1.4,1.5)      | 2.3 (2.0,2.6)       | P < 0.001 | 98.7 |
| Lymphocytes 6-12 hours after surgery, x10 <sup>3</sup> /μL  | 0.9 (0.8,0.9)      | 1.3 (1.0,1.6)       | 0.09      | 93.8 |
| Lymphocytes 12-24 hours after surgery, x10 <sup>3</sup> /μL | 1.2 (1.1,1.2)      | 1.4 (1.2,1.6)       | 0.86      | 39.5 |
| Lymphocytes at day 2 after surgery, x10 <sup>3</sup> /μL    | 1.5 (1.5,1.6)      | 1.6 (1.4,1.8)       | P < 0.001 | 85.3 |
| Lymphocytes at day 3 after surgery, x10 <sup>3</sup> /μL    | 1.9 (1.8,1.9)      | 2.0 (1.8,2.2)       | P < 0.001 | 90.9 |
| Lymphocytes at day 4 after surgery, x10 <sup>3</sup> /μL    | 2.2 (2.1,2.2)      | 2.6 (2.3,2.9)       | 0.56      | 92.8 |
| <b>Euroscore</b>                                            |                    |                     |           | 47.3 |
| Euroscore I                                                 | 5.8 (5.7,5.9)      | 8.9 (8.4,9.4)       | P < 0.001 |      |

|                                   |                  |                     |           |       |
|-----------------------------------|------------------|---------------------|-----------|-------|
| Creatinine value, µmol/ L         | 95.8 (92.1,99.4) | 130.4 (105.8,154.9) | P < 0.001 |       |
| Chronic pulmonary disease         | 735 (15.9)       | 86 (27.2)           | P < 0.001 |       |
| Extracardiac arteriopathy         | 926 (20.1)       | 95 (30.4)           | P < 0.001 |       |
| Neurological dysfunction          | 249 (5.4)        | 34 (10.8)           | P < 0.001 |       |
| Previous Cardiac Surgery          | 220 (4.8)        | 24 (7.6)            | 0.04      |       |
| Creatinine > 200 µmol/ L          | 218 (8.1)        | 53 (23.9)           | P < 0.001 |       |
| Active endocarditis               | 53 (1.2)         | 17 (5.4)            | P < 0.001 |       |
| Critical preoperative state       | 305 (6.7)        | 63 (20.0)           | P < 0.001 |       |
| Unstable angina                   | 871 (19.0)       | 82 (26.1)           | P < 0.001 |       |
| LV function                       |                  |                     |           |       |
| Good                              | 2930 (36.5)      | 154 (20.6)          | P < 0.001 |       |
| Moderate                          | 1360 (16.9)      | 111 (14.8)          | 0.15      |       |
| Poor                              | 292 (3.6)        | 49 (6.5)            | P < 0.001 |       |
| Recent MI                         | 785 (17.0)       | 57 (18.0)           | 0.71      |       |
| Pulmonary hypertension            | 134 (2.9)        | 29 (9.2)            | P < 0.001 |       |
| Emergency                         | 210 (7.8)        | 38 (17.2)           | P < 0.001 |       |
| Other than isolated CABG          | 1747 (37.9)      | 152 (48.1)          | P < 0.001 |       |
| Surgery on thoracic aorta         | 140 (3.0)        | 111 (3.5)           | 0.77      |       |
| Post infarct septal rupture       | 6 (0.13)         | 1 (0.32)            | 0.94      |       |
| Urgency                           |                  |                     |           |       |
| Elective                          | 1710 (21.3)      | 71 (9.5)            | P < 0.001 |       |
| Life-threatening                  | 34 (0.42)        | 8 (1.07)            | 0.03      |       |
| Urgent                            | 168 (2.1)        | 16 (2.1)            | 0.96      |       |
| <b>Acute kidney injury, N (%)</b> |                  |                     | <0.001    | 15.3% |
| AKI 0                             | 6398 (93.9)      | 418 (6.1)           | <0.001    |       |
| AKI 1                             | 712 (81.8)       | 159 (18.2)          | <0.001    |       |
| AKI 2                             | 67 (61.5)        | 42 (38.5)           | <0.001    |       |
| AKI 3                             | 98 (53.9)        | 84 (46.1)           | <0.001    |       |

Parametric continuous variables are presented as mean (95% CI) and compared using Student's t-test; non-parametric variables are reported as median [IQR] and compared using the Wilcoxon signed rank test. Categorical variables are represented as number, with the percentage in parentheses. BMI = body mass index, eCCR = estimated creatinine clearance, CPB = cardio-pulmonary bypass, HR = heart rate, SBP = systolic blood pressure, DBP = diastolic blood pressure, CVP = central venous pressure, PaCO<sub>2</sub> = arterial CO<sub>2</sub> pressure, CETCO<sub>2</sub> = end-tidal carbon dioxide, PaO<sub>2</sub> = arterial oxygen pressure, SaO<sub>2</sub> = oxygen saturation, ESR = erythrocyte sedimentation rate, LDH = lactate dehydrogenase, Hb = hemoglobin, ALAT = alanine aminotransferase, ASAT = aspartate aminotransferase, LV = left ventricle, MI = myocardial infarction, CABG = coronary artery bypass grafting.



**eTable 3.** Area Under Receiver Operating Characteristic Curves for Models for 30-d Mortality Prediction

AUROC are presented with 95% confidence interval.

| Model                       | AUROC            |
|-----------------------------|------------------|
| Entire perioperative period | 0.81 (0.78,0.86) |
| Postoperative only          | 0.78 (0.74,0.83) |
| Intra- and postoperative    | 0.77 (0.72,0.82) |
| Pre- and postoperative      | 0.75 (0.70,0.80) |
| Pre- and intraoperative     | 0.47 (0.41,0.53) |
| Intraoperative only         | 0.58 (0.51,0.64) |
| Preoperative only           | 0.70 (0.61,0.71) |

**eTable 4.** Area Under Receiver Operating Characteristic Curves for Models for 1-y Mortality Prediction

AUROC are presented with 95% confidence interval.

| Model                       | AUROC            |
|-----------------------------|------------------|
| Entire perioperative period | 0.82 (0.78,0.86) |
| Postoperative only          | 0.79 (0.74,0.83) |
| Intra- and postoperative    | 0.79 (0.74,0.84) |
| Pre- and postoperative      | 0.79 (0.74,0.83) |
| Pre- and intraoperative     | 0.44 (0.37,0.49) |
| Intraoperative only         | 0.51 (0.45,0.56) |
| Preoperative only           | 0.66 (0.61,0.71) |

**eTable 5.** Area Under Receiver Operating Characteristic Curves for Models for 5-y Mortality Prediction

AUROC are presented with 95% confidence interval.

| Model                       | AUROC            |
|-----------------------------|------------------|
| Entire perioperative period | 0.79 (0.75,0.84) |
| Postoperative only          | 0.77 (0.73,0.82) |
| Intra- and postoperative    | 0.78 (0.73,0.83) |
| Pre- and postoperative      | 0.76 (0.72,0.82) |
| Pre- and intraoperative     | 0.48 (0.42,0.54) |
| Intraoperative only         | 0.51 (0.45,0.56) |
| Preoperative only           | 0.69 (0.64,0.74) |

**eFigure 1.** Survival Curves and Survival Statistics for Entire Cohort and by Operation Type. Panels A-D: Full cohort, CABG, Valve, Combined.

**(A) 30-day, 1-year and 5-year survival curves for whole cohort**

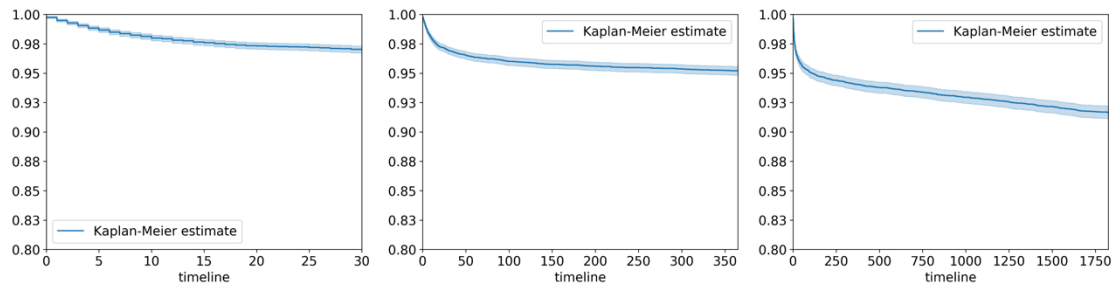

| Operation type | 30-day mortality | 1-year mortality | 5-year mortality |
|----------------|------------------|------------------|------------------|
| All            | 268 (3.1%)       | 420 (4.8%)       | 612 (7.0%)       |

**(B) 30-day, 1-year and 5-year survival curves for CABG**

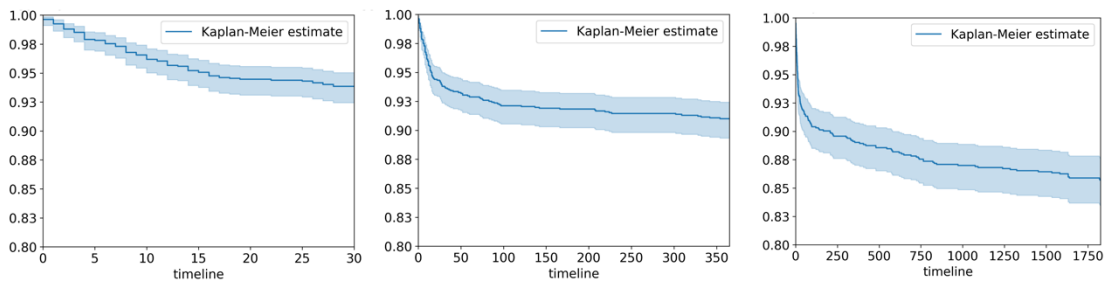

| Operation type | 30-day mortality | 1-year mortality | 5-year mortality |
|----------------|------------------|------------------|------------------|
| CABG           | 126 (2.4%)       | 191 (3.6%)       | 310 (5.9%)       |

**(C) 30-day, 1-year and 5-year survival curves for valve surgery**

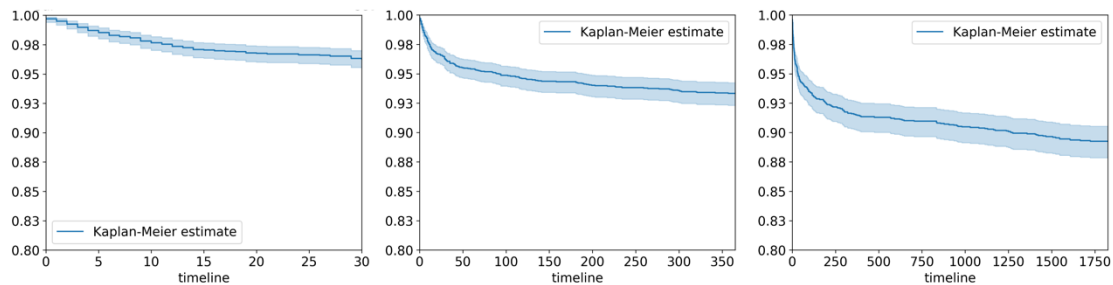

| Operation type | 30-day mortality | 1-year mortality | 5-year mortality |
|----------------|------------------|------------------|------------------|
| Valve          | 73 (3.2%)        | 132 (5.8%)       | 173 (7.5%)       |

**(D) 30-day, 1-year and 5-year survival curves for combined valve and CABG surgery**

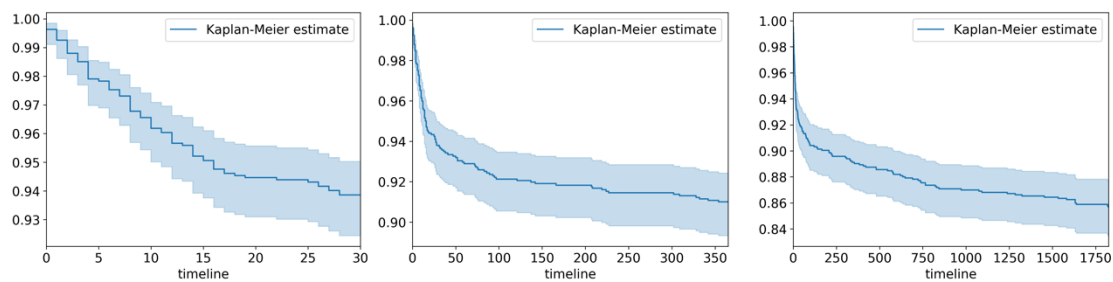

| Operation type | 30-day mortality | 1-year mortality | 5-year mortality |
|----------------|------------------|------------------|------------------|
| Combined       | 69 (5.7%)        | 97 (8.0%)        | 129 (10.6%)      |

**eFigure 2.** Calibration Plot for Model Predicting 30-d Mortality in Full Cohort (A) entire perioperative period model and (B) postoperative period model.

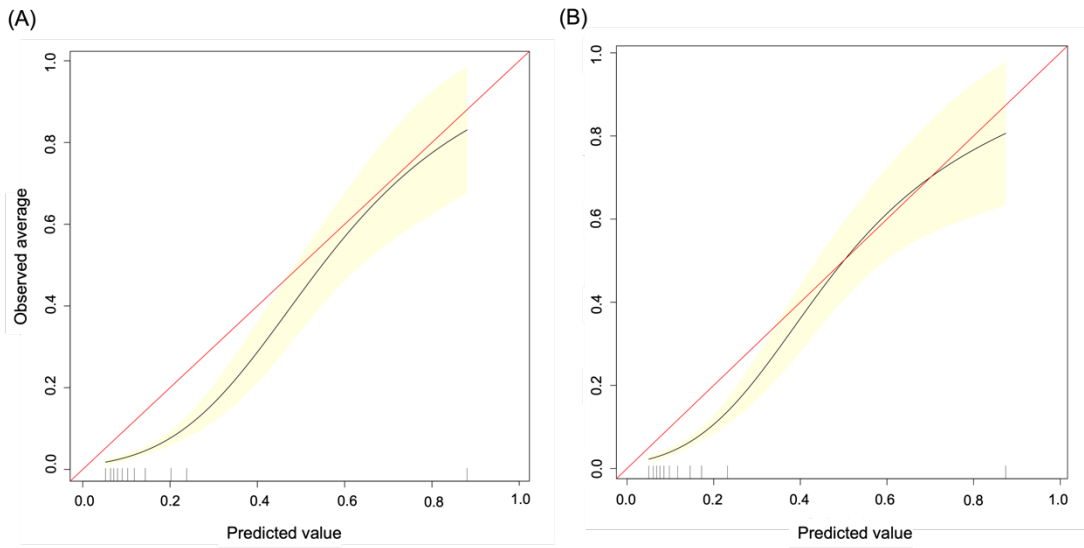

**eFigure 3.** Calibration Plot for Model Predicting 1-y Mortality in Full Cohort (A) entire perioperative period model and (B) postoperative period model.

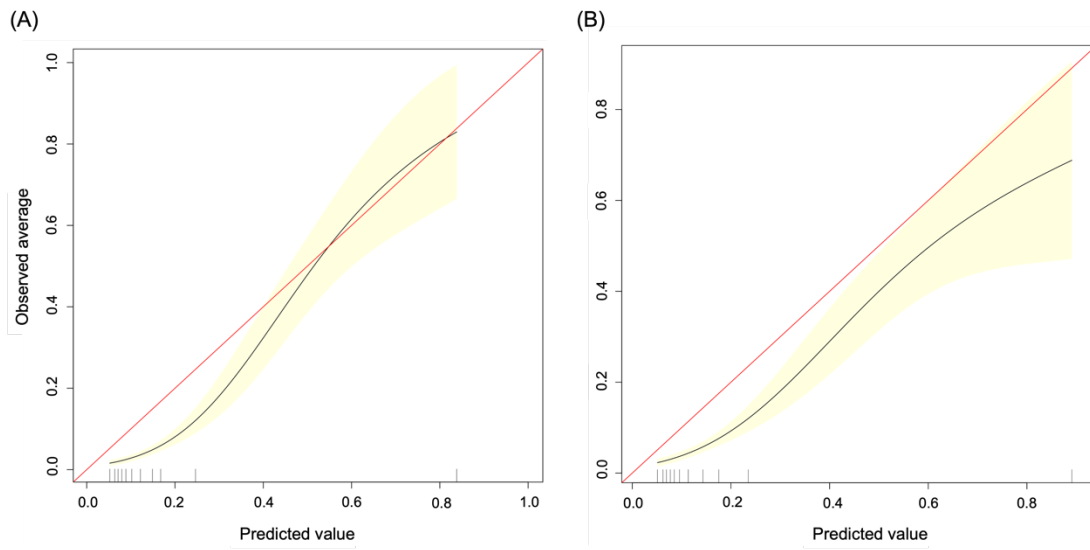

**eFigure 4.** Calibration Plot for Model Predicting 5-y Mortality in Full Cohort (A) entire perioperative period model and (B) postoperative period model.

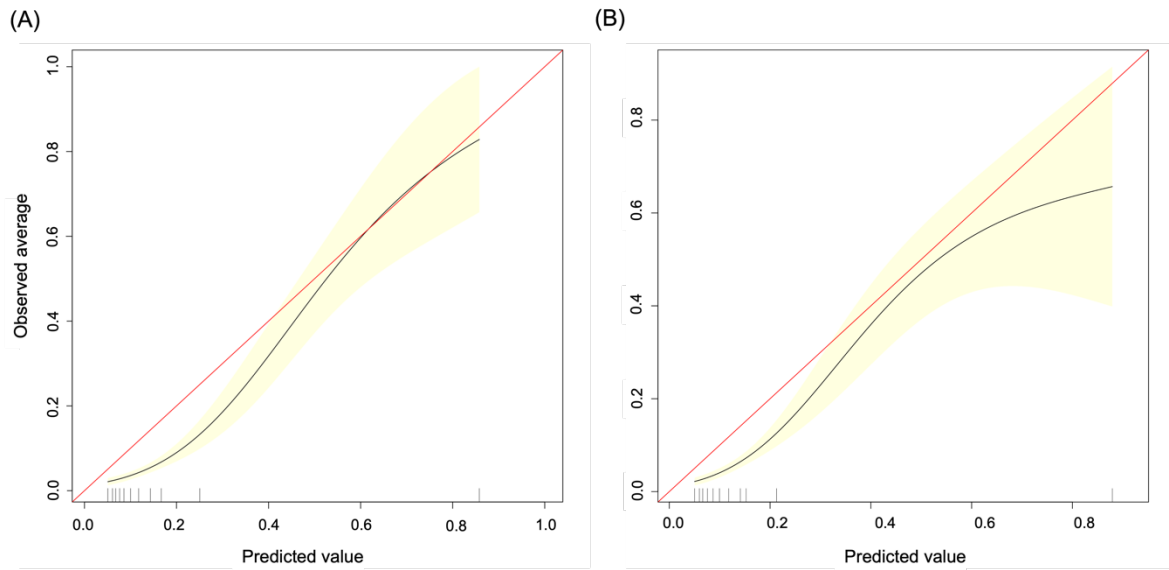

**eFigure 5.** Predictiveness Plots for Models Including Data From All 3 Perioperative Periods  
30-day mortality (A), 1-year mortality (B), and 5-year mortality (C).

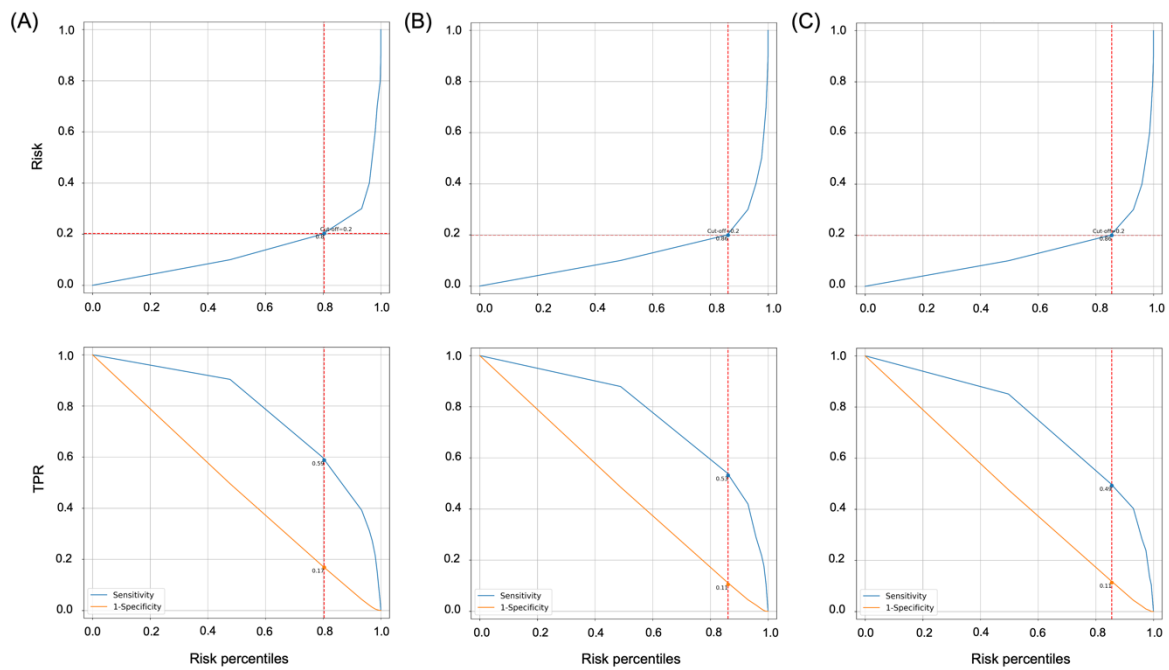

TPR = true positive rate.



**eFigure 6.** Predictiveness Plots for Models Including Postoperative Data Only  
 30-day mortality (A), 1-year mortality (B), and 5-year mortality (C).

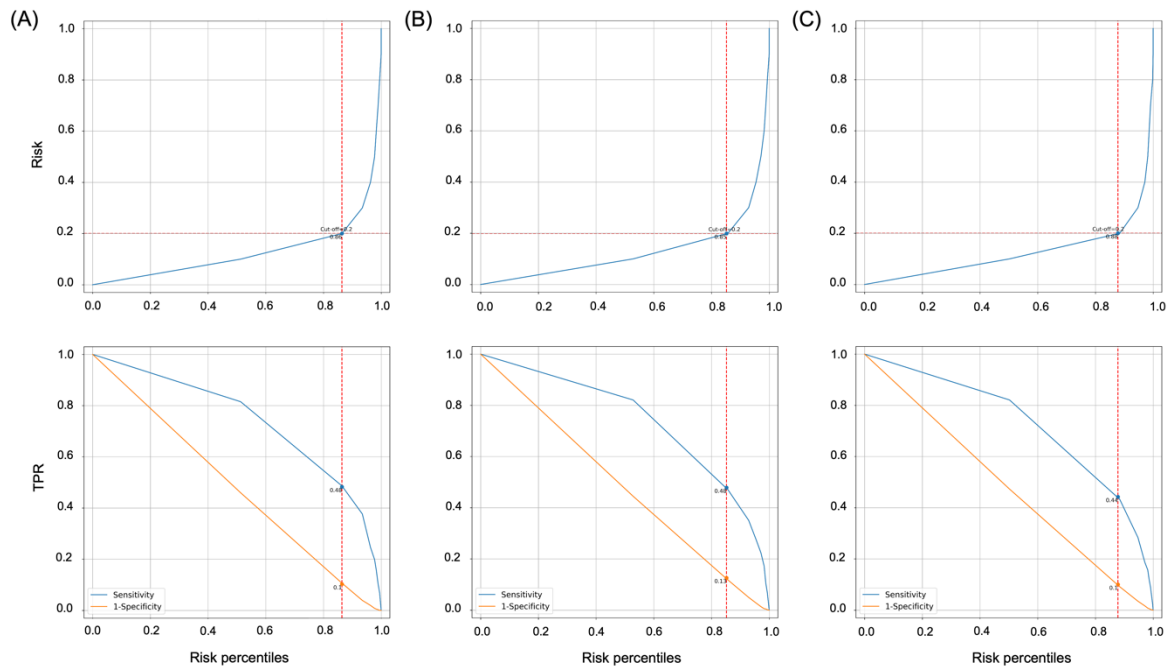

TPR = true positive rate

**eFigure 7.** Contribution of Input Features to Mortality Predictions for Coronary Artery Bypass Grafting Operations

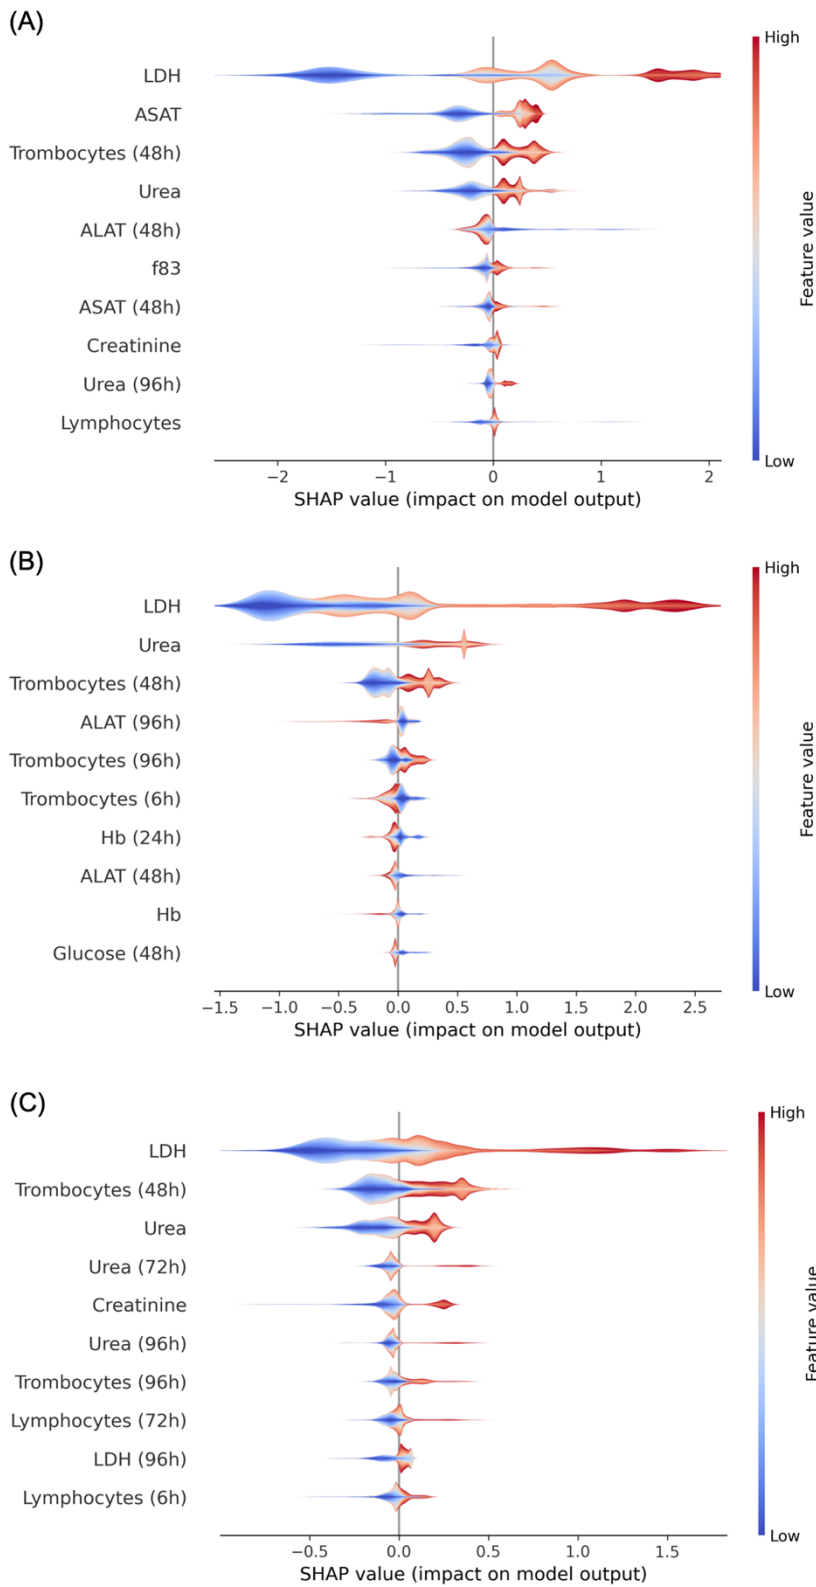

Positive SHAP values represent the theoretical impact of the feature towards mortality, with higher values represented in red, lower values in blue, and values left of the x axis driving predictions towards survival, and on the right towards mortality. (A) Top 10 features for 30-day mortality predictions. (B) Top 10 features for 1-year mortality predictions. (C) Top 10 features for 5-year mortality predictions.

**eFigure 8.** Contributions of Input Features to Mortality Predictions for Valve Operations

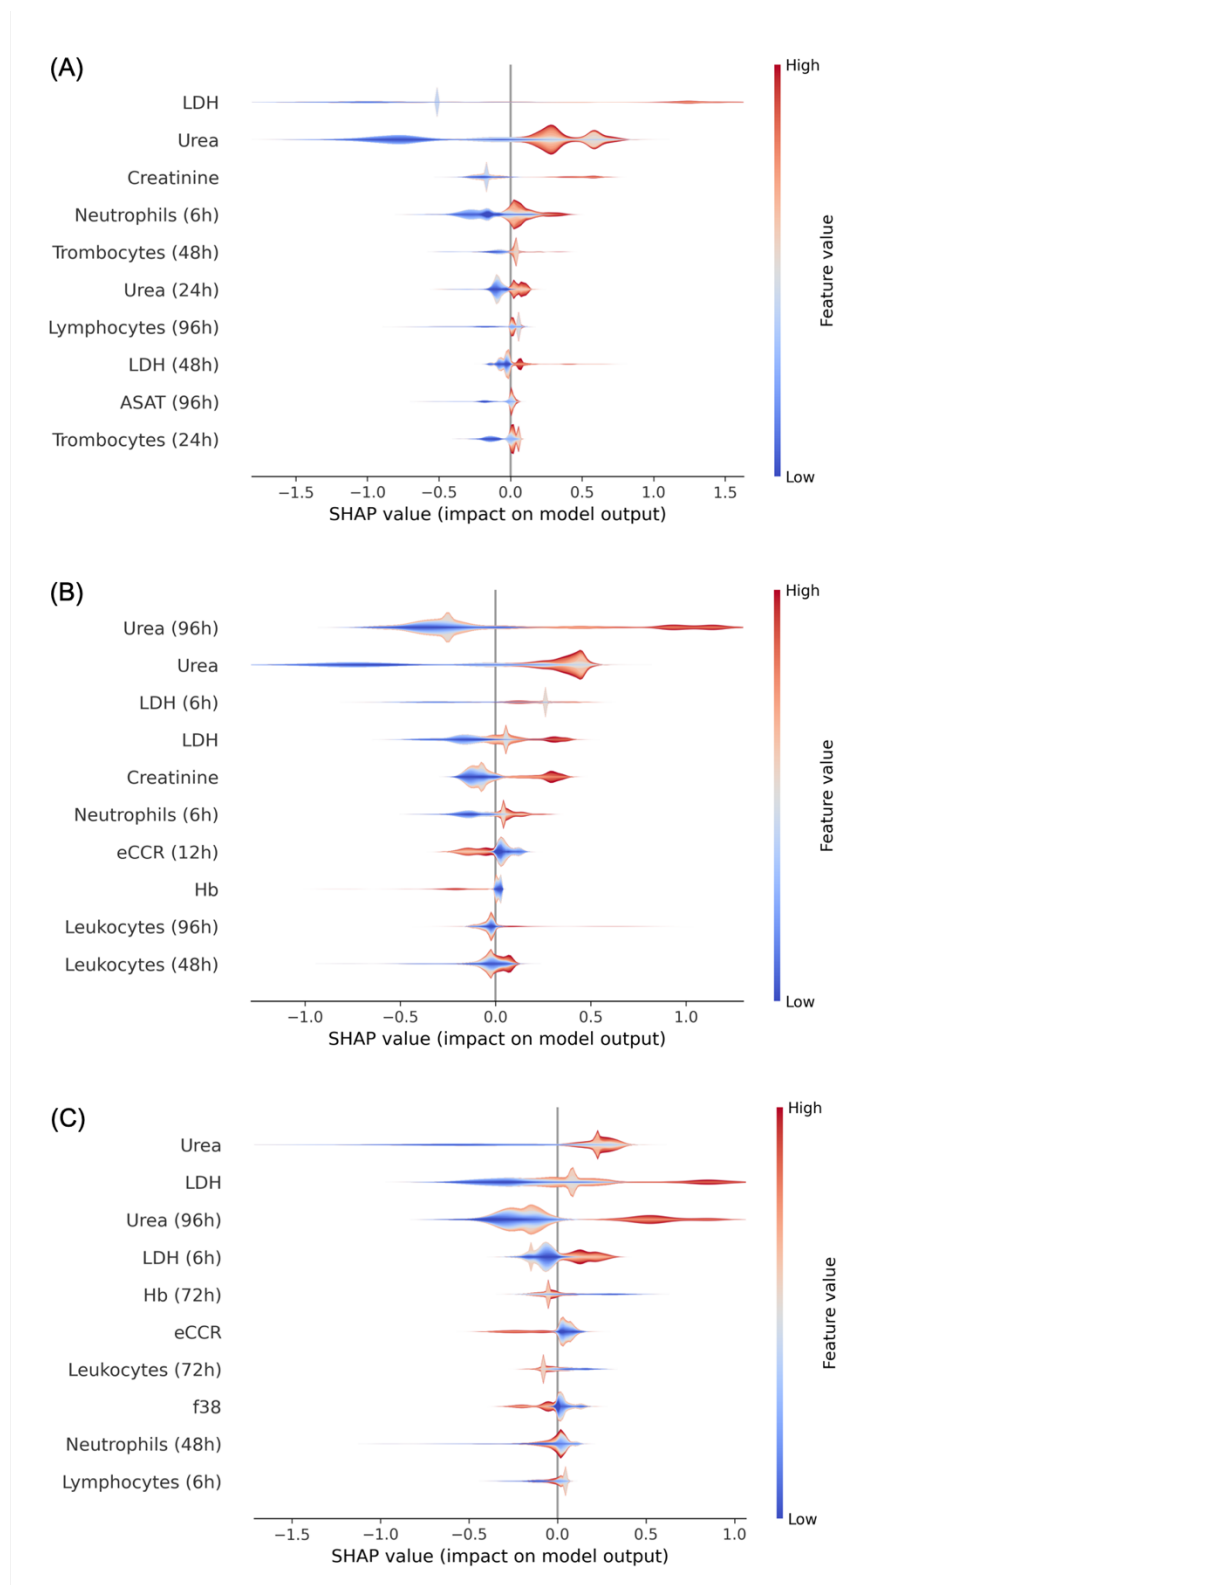

Positive SHAP values represent the theoretical impact of the feature towards mortality, with higher values represented in red, lower values in blue, and values left of the x axis driving predictions towards survival, and on the right towards mortality. (A) Top 10 features for 30-day mortality predictions. (B) Top 10 features for 1-year mortality predictions. (C) Top 10 features for 5-year mortality predictions.

**eFigure 9.** Contributions of Input Features on Mortality Predictions for Combined Operations

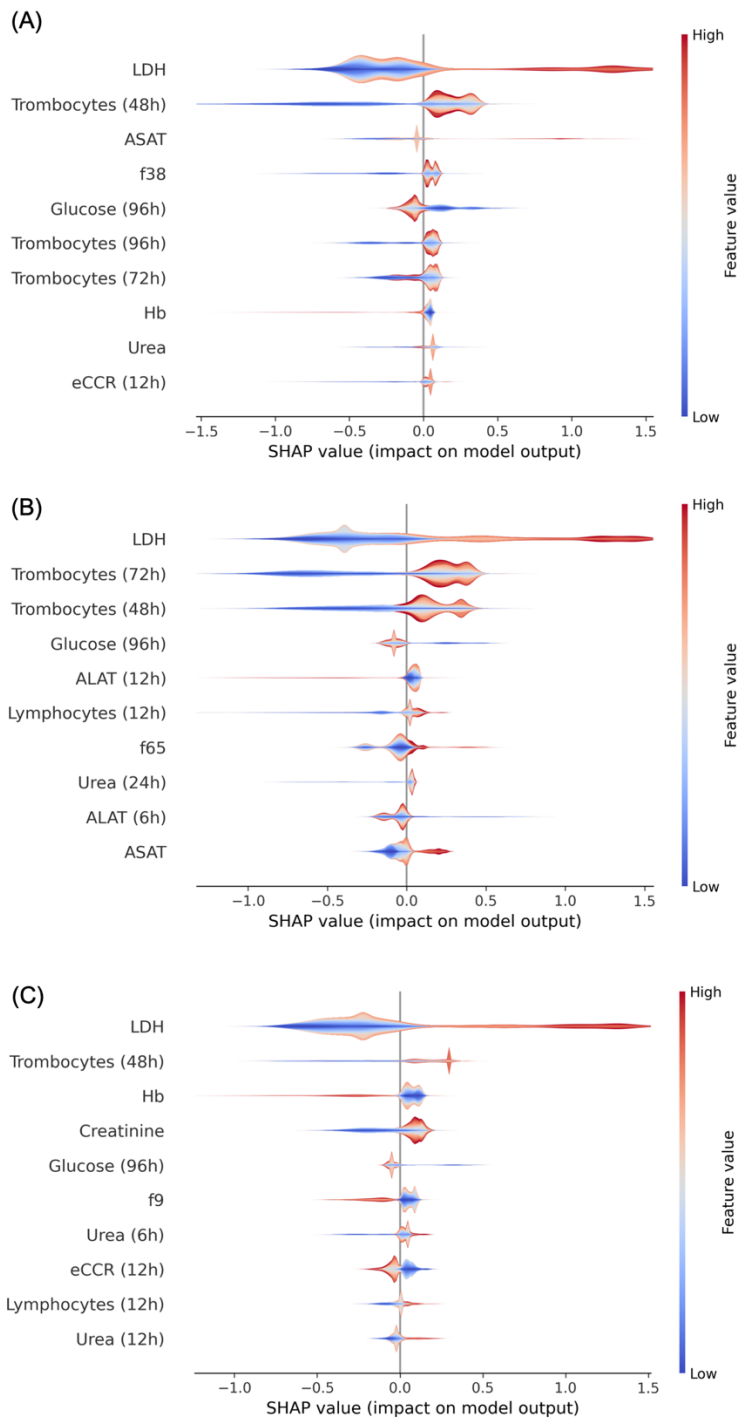

Positive SHAP values represent the theoretical impact of the feature towards mortality, with higher values represented in red, lower values in blue, and values left of the x axis driving predictions towards survival, and on the right towards mortality. (A) Top 10 features for 30-day mortality predictions. (B) Top 10 features for 1-year mortality predictions. (C) Top 10 features for 5-year mortality predictions.
